# Contributions of $\beta$ -Cell Dysfunction and Insulin Resistance to the Pathogenesis of Impaired Glucose Tolerance and Impaired Fasting Glucose

MUHAMMAD A. ABDUL-GHANI, MD, PHD

DEVJIT TRIPATHY, MD, PHD

RALPH A. DEFONZO, MD

Impaired glucose tolerance (IGT) and impaired fasting glucose (IFG) are intermediate states in glucose metabolism that exist between normal glucose tolerance and overt diabetes. Epidemiological studies demonstrate that the two categories describe distinct populations with only partial overlap, suggesting that different metabolic abnormalities characterize IGT and IFG. Insulin resistance and impaired  $\beta$ -cell function, the primary defects observed in type 2 diabetes, both can be detected in subjects with IGT and IFG. However, clinical studies suggest that the site of insulin resistance varies between the two disorders. While subjects with IGT have marked muscle insulin resistance with only mild hepatic insulin resistance, subjects with IFG have severe hepatic insulin resistance with normal or near-normal muscle insulin sensitivity. Both IFG and IGT are characterized by a reduction in early-phase insulin secretion, while subjects with IGT also have impaired late-phase insulin secretion. The distinct metabolic features present in subjects with IFG and IGT may require different therapeutic interventions to prevent their progression to type 2 diabetes.

*Diabetes Care* 29:1130–1139, 2006

Glucose is the principal fuel used by humans and is the sole source of energy for the brain. Not surprisingly, glucose homeostasis is tightly controlled, and the fasting plasma glucose concentration is maintained within a very narrow range (70–90 mg/dl) (1). In type 2 diabetes, both insulin secretion and action are impaired (2–4), and chronic hyperglycemia is a characteristic feature of this common metabolic disorder. Unlike type 1 diabetes, where the disease onset is relatively acute, the course of type 2 diabetes is slow and the metabolic abnormalities that lead to hyperglycemia are established long before overt diabetes (as defined by World Health Organization/American Diabetes Association criteria [5,6]) develops (7–9). This state, where

abnormalities in glucose metabolism are present but elevation in glucose is below the cutoff point for establishing the diagnosis of type 2 diabetes, is referred to as pre-diabetes (10). Defining cut points for pre-diabetes and diabetes has generated much debate among the medical community (11,12), and these cut off points have been subject to revision over time (5,6,13,14). Pre-diabetes includes subjects with high fasting plasma glucose (FPG) concentration and normal response to a glucose load (IFG), subjects with abnormal postprandial glucose excursion but normal FPG concentration (IGT), and combination of IGT plus IFG (14).

In 1979, an international workgroup defined type 2 diabetes as an FPG  $\geq 140$

mg/dl (7.8 mmol/l) or 2-h plasma glucose  $\geq 200$  mg/dl (11.1 mmol/l) following 75-g oral glucose load (14). It also created a new category, IGT, defined as a 2-h plasma glucose of 140–199 mg/dl (7.8–11.0 mmol/l) with normal FPG. IGT was meant to replace the terms “borderline” and “chemical” diabetes. In 1997, the American Diabetes Association revised its diagnostic criteria for diabetes (6), lowering the FPG cut point to  $\geq 126$  mg/dl (7 mmol/l), and created a new category, IFG, which identified subjects with a high FPG ( $\geq 110$  mg/dl [6.1 mmol/l]), which was below the threshold for diabetes ( $\geq 126$  mg/dl [7.0 mmol/l]). IFG was meant to be “analogous” to IGT and identify subjects with an intermediate stage between normal glucose tolerance (NGT) and overt diabetes. The cut point for IFG recently was revised to include subjects with FPG between 100 and 125 mg/dl (5.6–6.9 mmol/l) (14). This lower FPG of 100 mg/dl (5.6 mmol/l) was chosen to establish a cut point that identified similar percentages of the general population with IGT and IFG, although these need not be the same individuals.

In the current review, we examine metabolic abnormalities that characterize IFG and/or IGT to provide insight into development of therapeutic strategies to slow/halt progression of IFG and/or IGT to type 2 diabetes.

## EPIDEMIOLOGY OF IFG AND IGT

— Epidemiological studies comparing the prevalence of IFG and IGT consistently have demonstrated that they define two distinct populations with only partial overlap (15–26). This observation was consistent in all ethnic groups studied. Only a small percentage of IGT subjects (20–25%) had FPG  $> 110$  mg/dl (6.1 mmol/l), and over half of IFG subjects had 2-h plasma glucose  $< 140$  mg/dl (7.8 mmol/l). Since most of these studies were done before 2003, an FPG of 110 mg/dl (6.1 mmol/l) was used as cut point for IFG. The prevalence of both IFG and IGT varies considerably based on ethnicity, ranging from a low of 6.3% in Chinese

From the Division of Diabetes, University of Texas Health Science Center at San Antonio, San Antonio, Texas.

Address correspondence and reprint requests to Muhammad Abdul-Ghani, Division of Diabetes, University of Texas Health Science Center at San Antonio, 7703 Floyd Curl Dr., San Antonio, TX 78229. E-mail: albarado@uthscsa.edu.

Received for publication 8 November 2005 and accepted in revised form 26 January 2006.

**Abbreviations:** AIR, acute insulin response; CGI, combined glucose intolerance; FPG, fasting plasma glucose; FPI, fasting plasma insulin; GIP, glucose-dependent insulinotropic peptide; GLP-1, glucagon-like peptide-1; HOMA-IR, homeostasis model assessment of insulin resistance; IFG, impaired fasting glucose; IGT, impaired glucose tolerance; IVGTT, intravenous glucose tolerance test; NGT, normal glucose tolerance; OGTT, oral glucose tolerance test.

A table elsewhere in this issue shows conventional and Système International (SI) units and conversion factors for many substances.

DOI: 10.2337/dc05-2179

© 2006 by the American Diabetes Association.

Table 1—Prevalence of IFG and IGT among different populations

| Population  | Reference | Prevalence (%)<br>of isolated IGT | Prevalence (%)<br>of isolated IFG | % of IGT<br>with IFG | % of IFG<br>with IGT |
|-------------|-----------|-----------------------------------|-----------------------------------|----------------------|----------------------|
| European    | 21        | 8.8                               | 6.9                               | 26.0                 | 31.0                 |
| Australian  | 18        | 8                                 | 5.7                               | 24.5                 | 31.3                 |
| Mauritius   | 19        | 13.8                              | 4.2                               | 19.4                 | 44.4                 |
| Pima Indian | 17        | 10.7                              | 1.9                               | 18.9                 | 56.8                 |
| Swedish     | 20        | 20.3                              | 9.7                               | 27.2                 | 43.9                 |
| Chinese     | 23        | 6.3                               | 0.9                               | 14.7                 | 53                   |
| American    | 22        | 11                                | 4.4                               | 26.3                 | 46.9                 |
| Korean      | 16        | 20.1                              | 2.7                               | 13.4                 | 53                   |

(23) to a high of 20.3% in a Swedish population (20). The prevalence of IFG also varies among ethnic groups, but its prevalence consistently is lower than that of IGT in all populations (Table 1).

IGT and IFG also differ in their age and sex distribution (27–30). The prevalence of both categories increases with age, but under the age of 55, IGT is more frequent in women, while prevalence of IFG is more than twofold higher in men than women (27–30). The differences between IFG and IGT with respect to prevalence, age, and sex preference, as well as the lack of consistent overlap between both categories, suggest that even though IFG and IGT represent intermediate stages of glucose intolerance, they are likely to be distinct conditions with different pathophysiological etiologies.

### NORMAL GLUCOSE HOMEOSTASIS

— In the postabsorptive state the majority (~65–70%) of glucose uptake ( $\sim 2 \text{ mg} \cdot \text{kg}^{-1} \cdot \text{min}^{-1}$ ) occurs in insulin-insensitive tissues (brain, erythrocytes, and splanchnic tissues) (31) and glucose uptake is precisely matched by the rate of endogenous glucose production, primarily by the liver (31) and to a smaller extent by the kidney (32). Thus, hepatic glucose production is the main contributor to the FPG concentration (33) and is regulated primarily by the plasma insulin and glucagon concentrations (34).

Following glucose ingestion, the increase in plasma glucose stimulates insulin secretion. The combination of hyperglycemia plus hyperinsulinemia combines to suppress hepatic glucose production and stimulate glucose uptake by splanchnic and peripheral (primarily muscle) tissues to dispose of the ingested glucose and restore normoglycemia (35,36). The route of glucose entry into the body plays an important role in the

maintenance of NGT and tissue distribution of administered glucose (37). Hepatic glucose uptake is much greater with oral compared with intravenous glucose (34). Thus, while only 10–15% of infused glucose is taken up by the liver, this increases to 30–40% when glucose is administered orally.

### METABOLIC CHARACTERIZATION OF IFG AND IGT: METHODOLOGICAL CONSIDERATIONS

— A variety of methods have been utilized to evaluate the contributions of impaired insulin sensitivity and decreased insulin secretion to the genesis of IFG and IGT. We briefly will discuss these methods, since interpretation of published results is highly dependent on methodology used.

#### Measurement of insulin sensitivity

The glucose clamp technique (38) in its two variations, hyperinsulinemic-euglycemic clamp and hyperglycemic clamp, is considered the gold standard for measuring insulin sensitivity and insulin secretion, respectively. During the hyperinsulinemic-euglycemic clamp, glucose is given intravenously and skeletal muscle is the major site (80–90%) of glucose disposal (39). Furthermore, the plasma insulin concentration ( $\sim 80\text{--}100 \mu\text{U/ml}$ ) during insulin clamp causes near-complete suppression of endogenous glucose production. Therefore, insulin sensitivity measured with hyperinsulinemic-euglycemic clamp mainly reflects peripheral tissues, primarily muscle. The insulin sensitivity index ( $S_i$ ) measured with the fast-sampling intravenous glucose tolerance test or intravenous glucose tolerance test (IVGTT) (40) reflects both hepatic and muscle insulin sensitivity and correlates well with glucose disposal rate measured with insulin clamp (41).

Measurement of plasma glucose and insulin concentrations under fasting conditions and during oral glucose tolerance test (OGTT) has been used to derive indexes of insulin sensitivity (42–44), and they correlate reasonably with insulin sensitivity measured with the hyperinsulinemic-euglycemic clamp. Homeostasis model assessment of insulin resistance (HOMA-IR) (43) and the quantitative insulin sensitivity check index (QUICKI) (44) indexes (derived from FPG and fasting plasma insulin [FPI] concentrations) have been used most widely in epidemiological studies. Since the FPG primarily is determined by hepatic glucose output (33) and FPI is the main regulator of hepatic glucose production (34), the product of  $\text{FPG} \times \text{FPI}$  is an index of hepatic insulin resistance. Since hepatic insulin resistance has ~70% correlation with peripheral (muscle) insulin resistance (45), HOMA-IR correlates reasonably well with insulin resistance measured by hyperinsulinemic-euglycemic clamp (46). However, in cases where liver and muscle insulin resistance are discordant, discrepancy between HOMA-IR and glucose disposal during insulin clamp is observed (47,48).

Following glucose ingestion, the suppression of hepatic glucose production is much less complete than during the euglycemic insulin clamp (49), and ~30–40% of ingested glucose is taken up by splanchnic area (37). Consequently, plasma glucose concentration during OGTT is affected both by hepatic insulin resistance and insulin resistance in peripheral (muscle) tissues, which dispose of ~60–70% of ingested glucose. Thus, indexes of whole-body insulin sensitivity derived from plasma glucose and insulin concentrations during OGTT, e.g., Matsuda index, reflect both muscle and liver insulin sensitivity. Such indexes correlate well ( $R$  value  $\sim 0.70$ ) with insulin sensitivity measured with euglycemic insulin clamp (42).

#### Measurement of insulin secretion

Insulin secretion is markedly influenced by the route of glucose administration. When glucose is administered via gastrointestinal tract, a much greater stimulation of insulin secretion is observed compared with similar hyperglycemia created with intravenous glucose. The difference in insulin secretion between intravenous versus oral glucose administration is referred to as the incretin effect (50) and is mediated by glucagon like peptide-1

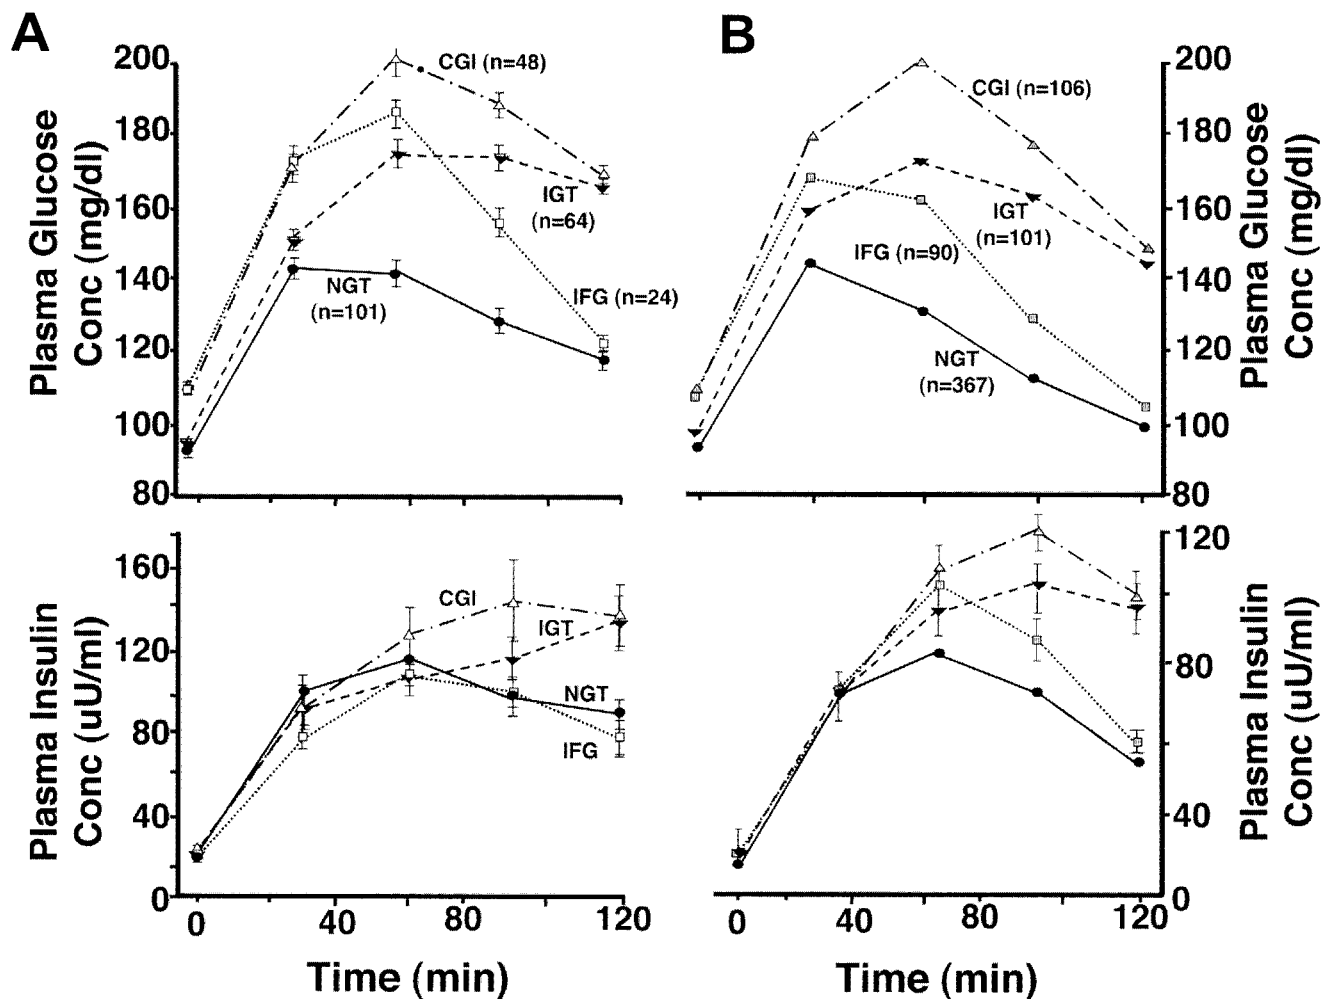

**Figure 1**—Plasma glucose and insulin concentration during OGTTs performed in subjects with NGT, IGT, IFG, and CGI. Data represent results from Abdul-Ghani et al. (48) (A) and Hanefeld et al. (68) (B).

(GLP-1) and glucose-dependent insulinotropic peptide (GIP) (51). Reduced glucose-stimulated GLP-1 secretion consistently has been observed in type 2 diabetes (52), and this will have a major impact on measurement of insulin secretion during OGTT, while having no effect on measurement of insulin secretion in response to intravenous glucose. In contrast to GLP-1, GIP levels are elevated in type 2 diabetes and resistance to GIP is a characteristic feature of the diabetic state (53). GLP-1 and GIP secretion in individuals with IGT and IFG has been less well characterized (54,55).

Insulin secretion in response to intravenous glucose also differs from oral glucose in its temporal pattern. Following glucose ingestion there is a gradual rise in plasma glucose concentration (reflecting the slow rate of glucose absorption), and this is accompanied by gradual increase in plasma insulin. The abrupt rise in plasma

glucose following intravenous glucose causes a rapid and transient increase in plasma insulin concentration (first-phase insulin secretion), which lasts for ~10 min. This is followed by a slower, sustained rise in plasma insulin (second-phase insulin secretion), which persists as long as plasma glucose remains elevated (38).

In clinical studies, insulin secretion is evaluated by measuring plasma insulin or C-peptide response to oral or intravenous glucose. The amount of insulin secreted must be related to the increment in plasma glucose concentration, which provides the stimulus to  $\beta$ -cells (56). In NGT subjects, the amount of insulin secreted in response to glucose is correlated inversely with peripheral insulin sensitivity (2,3,57,58). Reduced insulin sensitivity, through as-yet-unidentified mechanism(s), enhances plasma insulin response to any given glucose stimulus.

Therefore, if one wishes to compare  $\beta$ -cell function between subjects with different insulin sensitivity, an insulin secretion/insulin resistance index (disposition index) should be used (59,60).

The hyperglycemic clamp is considered the gold standard for measuring first- and second-phase insulin secretion. Although first-phase insulin secretion is an "artifact" only observed with acute intravenous glucose administration (there is no identifiable first-phase insulin secretion following glucose ingestion), many studies have demonstrated that loss of first-phase insulin secretion is a strong predictor of type 2 diabetes (62–64). The IVGTT also has been widely used to assess insulin secretion. The acute (0–10 min) insulin response (AIR) correlates with first-phase insulin response during the hyperglycemic clamp (65). A disadvantage of IVGTT is that the plasma glucose concentration declines rapidly following

glucose injection, and second-phase insulin secretory response cannot be measured. Use of the IVGTT also precludes assessment of the incretin effect.

Indexes of insulin secretion derived from OGTT provide an estimate of insulin secretion during the more physiological route of glucose administration. The insulinogenic index (increment in plasma insulin  $\div$  increment in plasma glucose) during the first 30 min of the OGTT has been utilized widely in epidemiological studies as a surrogate measure of first-phase insulin secretion, although it has not been extensively validated. One early study demonstrated a modest correlation ( $r = 0.61$ ,  $P < 0.001$ ) between  $\Delta I_{0-30}/\Delta G_{0-30}$  and acute insulin response during IVGTT (66), but a weaker correlation ( $r = 0.47$ ,  $P = 0.0005$ ) was observed in a more recent study (47).  $\Delta I$  (area under the curve) $_{0-120}/\Delta G$  (area under the curve) $_{0-120}$  also has been used as an index of insulin secretion during the OGTT (60). Ideally, these indexes should be related to severity of insulin resistance, e.g.,  $\Delta I_{0-30}/\Delta G_{0-30} \div IR$  (insulin resistance). This requires an independent measure of insulin sensitivity.

### ORAL GLUCOSE TOLERANCE IN SUBJECTS WITH IGT OR IFG

Approximately 20–25% subjects with IGT also have IFG and ~30–45% of IFG subjects have IGT (rev. in 15). To understand the metabolic abnormalities that are present in subjects with IGT or IFG, we will limit our discussion to studies that have assessed subjects with isolated IGT (2-h plasma glucose 140–199 mg/dl [7.8–11.0 mmol/l] and normal FPG <100 mg/dl [5.6 mmol/l]) or isolated IFG (FPG 100–125 mg/dl [5.6–6.9 mmol/l] and 2-h plasma glucose <140 mg/dl [7.8 mmol/l]).

During an OGTT, plasma glucose concentration in NGT subjects reaches a peak 30–60 min following glucose ingestion (Fig. 1) (42,48,67–69). Thereafter, it declines toward the fasting glucose level, reaching values <140 mg/dl (7.8 mmol/l) after 2 h. In NGT subjects, the peak plasma glucose concentration rarely rises >150–160 mg/dl (8.3–8.9 mmol/l). Subjects with isolated IGT, when compared with subjects with NGT, have comparable FPG concentrations (48,69, 70–78). However, following glucose ingestion, the plasma glucose rises rapidly at 30 min, continues to rise after 60 min, and remains >140 mg/dl (7.8 mmol/l) at

120 min (42,48,67–69,79). On mean, the plasma glucose concentration at 120 min is not different from that at 60 min. Thus, subjects with IGT manifest two abnormalities during OGTT: rapid and continuous rise in plasma glucose concentration and lack of decline in plasma glucose at 2 h. Subjects with IFG have higher FPG than individuals with NGT or IGT (48,67,70–78). Following glucose ingestion, plasma glucose concentration at 30 and 60 min increases to levels greater than in NGT and IGT. However, unlike subjects with IGT, the plasma glucose concentration in IFG progressively declines, reaching levels <140 mg/dl (7.8 mmol/l) at 120 min (48,68,69,79,80). Thus, subjects with isolated IFG have an elevated FPG, an exaggerated early rise in plasma glucose concentration following glucose ingestion, and plasma glucose similar to NGT at 120 min.

### INSULIN RESISTANCE IN IGT AND IFG

Insulin sensitivity (measured with hyperinsulinemic-euglycemic clamp or IVGTT) in subjects with isolated IGT consistently has been shown to be decreased compared with NGT (48,70–73). In three studies using hyperinsulinemic-euglycemic clamp (48,70,71), a mean decrease in insulin-stimulated glucose disposal of 30% was observed in IGT versus NGT. The impairment in insulin-stimulated glucose disposal was observed in all ethnic groups studied: 27% reduction in Pima Indians (70), 32% in Hispanics (48), and 21% in Japanese (71). In two (48,71) of the three studies, a 21% increase in insulin-stimulated glucose disposal was observed in IFG versus NGT. In the third study (70), insulin-stimulated glucose disposal was reduced in IFG versus NGT subjects. However, IFG subjects were significantly (25%) more obese than NGT or IGT subjects. When insulin-stimulated glucose disposal was adjusted for BMI (70), insulin sensitivity was similar in IFG and NGT subjects, while IGT subjects still manifested reduced insulin sensitivity compared with NGT.

Van Haeften et al. (74) and Pimenta et al. (81) also observed a 28% decrease in glucose infusion rate during hyperglycemic clamp studies performed in subjects with isolated IGT compared with NGT. Consistent with these observations, Festa et al. (72) and Osei et al. (73) reported 42% reduction in  $S_i$  measured with IVGTT in IGT subjects. Since insulin-

stimulated glucose disposal during insulin clamp primarily measures muscle insulin sensitivity, these studies collectively indicate that subjects with isolated IGT are characterized by muscle insulin resistance. The magnitude of decline (~30–35%) in muscle insulin sensitivity in IGT is comparable to that in normoglycemic first-degree relatives of diabetic subjects (7,82–84). These results suggest that muscle insulin resistance in type 2 diabetes is, at least in part, inherited and precedes development of overt diabetes. An inherited component of muscle insulin resistance has been demonstrated in type 2 diabetic individuals in populations as diverse as Pima Indians (85) and Swedes (86).

In contrast to IGT, subjects with isolated IFG generally have been reported to have normal or even enhanced insulin-stimulated muscle glucose disposal (48,71). The only exception to this is the study by Festa et al. (72), who reported a modest decline in  $S_i$  in IFG subjects. However, this could be explained by failure to completely suppress hepatic glucose production during IVGTT. Since subjects with isolated IFG have been shown to have hepatic insulin resistance (see below), impaired suppression of hepatic glucose production would result in slower decline in plasma glucose during IVGTT. Thus, although  $S_i$  is decreased, it could reflect hepatic, not muscle, insulin resistance.

During epidemiological studies, insulin sensitivity usually has been assessed with surrogate measures, most commonly HOMA-IR. In all populations, subjects with isolated IFG or isolated IGT had a significantly elevated HOMA-IR (~40 and ~30%, respectively) compared with NGT (48,68,69,72,75–78,86,87) (Table 2). In contrast to the suggestion by Festa et al. (72), we do not believe that this “discrepancy” between HOMA-IR and insulin clamp–derived measurements of insulin resistance in IFG subjects reflects methodological inconsistencies. Rather, this apparent discrepancy most likely reflects the different underlying physiological processes quantitated with the two techniques. HOMA-IR primarily reflects hepatic insulin resistance, while insulin clamp mainly reflects muscle insulin resistance. Our interpretation of the published results is that IFG individuals primarily are characterized by hepatic insulin resistance with normal muscle insulin sensitivity, while IGT subjects mainly have muscle insulin resistance with mild



Table 2—Insulin secretion and insulin sensitivity in IFG and IGT

| Study       | Reference | Population       | Index of insulin secretion | Index of insulin resistance | IFG* |                   |                    | IGT* |                       |                    |
|-------------|-----------|------------------|----------------------------|-----------------------------|------|-------------------|--------------------|------|-----------------------|--------------------|
|             |           |                  |                            |                             | FPI  | Insulin secretion | Insulin resistance | FPI  | Insulin secretion     | Insulin resistance |
| Wasada      | 71        | Japanese         | II                         | M                           | 1.05 | 0.41              | 1.21               | 1.33 | 0.72                  | 0.79               |
| Osei        | 73        | African American | AIR                        | $S_i$                       | —    | —                 | —                  | 1.23 | 0.64                  | 0.51               |
| Weyer       | 70        | Pima Indians     | AIR                        | M                           | 1.74 | 0.67              | NS                 | 1.4  | 0.92                  | 0.73               |
| Pimenta     | 81        | Brazilians       | 1st & 2nd                  | GIR                         | —    | —                 | —                  | 0.9  | 0.38 (1st) 0.49 (2nd) | 0.6                |
| van Haeften | 74        | Caucasian        | 1st & 2nd                  | GIR                         | —    | —                 | —                  | —    | 0.80 (1st) 0.80 (2nd) | 0.84               |
| Festa       | 72        | Mixed            | AIR                        | $S_i$                       | 1.37 | 0.64              | 0.81               | 1.25 | 0.82                  | 0.65               |
| Abdul-Ghani | 48        | Hispanic         | II                         | M                           | 1.33 | 0.77              | 1.21               | 1.17 | 0.37                  | 0.58               |
| Snehalatha  | 77        | Indian           | II                         | HOMA-IR                     | 1.13 | 1.03              | 0.75               | 1.26 | 0.93                  | 0.8                |
| Carnevale   | 87        | Caucasian        | HOMA-B                     | HOMA-IR                     | 1.19 | 0.42              | 0.63               | 1.61 | 1.47                  | 0.58               |
| Schianca    |           |                  |                            |                             |      |                   |                    |      |                       |                    |
| Piche       | 75        | Caucasian        | II                         | HOMA-IR                     | 3.04 | 1.03              | 0.26               | 2.08 | 0.57                  | 0.45               |
| Hanefeld    | 68        | Caucasian        | II                         | HOMA-IR                     | 1.34 | 0.78              | —                  | 1.35 | 0.63                  | —                  |
| Davies      | 76        | Caucasian        | None                       | HOMA-IR                     | 1.32 | 0.7               | 0.7                | 1.3  | 0.65                  | 0.77               |
| Abdul-Ghani | 69        | Arabs            | II                         | HOMA-IR                     | 1.57 | 0.51              | 1.95 0.69          | 0.94 | 0.22                  | 0.97 0.88          |
|             |           |                  |                            | Matsuda                     |      |                   |                    |      |                       |                    |
| Tripathy    | 86        | Swedes           | II                         | HOMA-IR                     | 1.11 | 0.92              | 0.65               | —    | 0.6                   | 0.89               |
| Novoa       | 78        | Spanish          | HOMA-B                     | HOMA-IR                     | 1.24 | 1                 | 0.65               | 1.46 | 1.5                   | 0.69               |

\*Ratio of IFG to NGT or IGT to NGT. 1st & 2nd, first and second phase of insulin secretion during hyperglycemic clamp; GIR, insulin-mediated glucose disposal during hyperglycemic clamp; HOMA-B, HOMA of  $\beta$ -cell activity; II, insulinogenic index; M, insulin-mediated glucose disposal during insulin clamp.

hepatic insulin resistance. This conclusion is consistent with two studies where hepatic glucose production was measured with tritiated glucose. In isolated IFG, the hepatic insulin resistance index (basal hepatic glucose production  $\times$  FPI) was markedly increased, while in IGT it was only minimally elevated (48,70). Subjects with isolated IFG also had impaired suppression of hepatic glucose production during insulin clamp (70).

## INSULIN SECRETION IN IGT AND IFG

Under fasting conditions, subjects with isolated IFG and isolated IGT have higher FPI concentrations than NGT subjects (Table 2). The basal insulin secretion rate (deconvolution of fasting plasma C-peptide concentration) increases linearly with the increase in FPG in both IGT and IFG and is not correlated with the 2-h plasma glucose concentration (88). In all published studies, the plasma insulin concentration at 30 min during OGTT in subjects with isolated IFG and isolated IGT is comparable to or significantly lower than in NGT, despite a significantly higher plasma glucose concentration (68,69,75–78,86,87). Thus, reduced  $\Delta I_{0-30}/\Delta G_{0-30}$  is a consistent finding in subjects with IGT and IFG, indicating an impaired early insulin secretory response to ingested glucose (Table 2). Unfortunately, the insulin secretion/

insulin resistance index only has been determined in one study (48), and  $\Delta I_{0-30}/\Delta G_{0-30} \div IR$  was reduced to a significantly greater extent in isolated IGT (73%) than in isolated IFG (23%). Viewed collectively, these studies demonstrate that subjects with isolated IFG and isolated IGT have a significant reduction in early (0–30 min) insulin response during OGTT. Total insulin response  $\Delta I_{0-120}/\Delta G_{0-120}$  during OGTT also is significantly reduced in subjects with isolated IFG and isolated IGT (48,68). The insulin secretion/insulin resistance index ( $\Delta I_{0-120}/\Delta G_{0-120} \div IR$ ) has been examined in only one study (48), and subjects with IGT had a more severe reduction than subjects with IFG. The insulin secretion/insulin resistance index ( $\Delta I_{60-120}/\Delta G_{60-120} \div IR$ ) during the 2nd hour of OGTT was similar in subjects with isolated IFG and NGT but reduced by 58% in isolated IGT. This reduction is comparable to the decrease (57%) in insulin secretion/insulin resistance index during the first 30 min of OGTT.

Studies using the IVGTT (70,72,73) have reported a decrease in AIR in both isolated IFG and IGT compared with NGT. Weyer et al. (70) reported 33% (IFG) and 8% (IGT) reductions, while Festa et al. (72) reported 36% (IFG) and 18% (IGT) reductions, respectively, in AIR compared with NGT. Ahren and Pa-

cini (89) found a 32% decrease in AIR in Caucasian postmenopausal women with IGT. In the three studies in which it was measured (70,72,74), subjects with isolated IGT had lower  $S_i$  than subjects with isolated IFG, indicating that the insulin secretion (AIR)/insulin resistance index is reduced similarly in IFG and IGT.

Two studies have measured insulin secretion with hyperglycemic clamp in IGT (75,82). Both studies found significant reductions in first- and second-phase insulin secretion. Van Haeften (74) reported 35 and 30% reductions, while Pimenta (81) reported 62 and 51% reductions compared with NGT. Although they did not calculate the insulin secretion/insulin resistance index, in both studies IGT subjects had significantly lower glucose infusion rates (despite increased plasma insulin responses) than NGT subjects. Therefore, expression of first- and second-phase insulin secretion in relation to insulin resistance would have yielded a more profound reduction in insulin secretion in IGT. No study has measured first- and second-phase insulin secretion with hyperglycemic clamp in IFG subjects.

The decrease in early insulin response (0–30 min) during OGTT in IFG and IGT is consistent with reduced AIR during IVGTT in both groups (70,72,73). It also is consistent with reduced first-phase in-

ulin secretion observed in IGT subjects studied with hyperglycemic clamp (74,81). These studies collectively suggest that subjects with IFG or IGT have impaired first-phase insulin secretion, which may explain their high risk for conversion to type 2 diabetes in epidemiological studies (15). The pivotal role of  $\beta$ -cell dysfunction in the conversion of IGT to type 2 diabetes is emphasized by intervention studies, which demonstrated that preservation of  $\beta$ -cell function decreases the conversion rate of IGT to diabetes (90,91).

Although reduced insulin secretion (insulinogenic index during OGTT and first-phase insulin response to intravenous glucose) consistently has been observed in all ethnic groups (Pima Indians, Hispanic, Caucasians, and Japanese), considerable variability in the magnitude of the decrease exists. Weyer et al. (70) reported an 8% reduction in AIR in Pima Indians with IGT, while Festa et al. (72) observed a greater reduction (18%) in AIR in Hispanic IGT subjects. An even greater decrease was reported in Caucasian women with IGT (32%) (89). This variation might simply reflect genetic differences or might be explained, in part, by differences in tissue sensitivity to insulin. In NGT subjects insulin secretion is related inversely to severity of insulin resistance (57,58). Thus, in NGT Pima Indians (a population characterized by severe insulin resistance [92]), the  $\beta$ -cell must function close to its maximal capacity to maintain normal glucose homeostasis. Consequently, a small decline in  $\beta$ -cell function will cause a significant deterioration in glucose tolerance, leading to IGT. In Hispanics (a population characterized by insulin resistance but not as severe as in Pima Indians), a greater decrease in insulin secretion is needed to cause a deterioration in glucose homeostasis, leading to IGT. In Caucasians, who are more sensitive to insulin than Hispanics, a much greater reduction in insulin secretion is required to lead to IGT. Other factors, such as age, total body fat content/distribution, plasma free fatty acid levels, and  $\beta$ -cell fat content may contribute to the differences in magnitude of reduction in AIR.

An interesting but as-yet-unanswered question relates to the etiologic significance of the impairment in insulin secretion, i.e., whether it is a primary or acquired defect. In longitudinal studies, reduced first-phase insulin secretion in NGT is a strong predictor of progression

to IGT and subsequently to type 2 diabetes (91,93,94). Studies that have assessed insulin secretion in IGT, using plasma C-peptide deconvolution (61) and graded glucose infusion (95), also have demonstrated impaired  $\beta$ -cell function. These observations suggest that impaired insulin secretion in IGT is primary and precedes the impairment in glucose intolerance. On the other hand, a small persistent rise in plasma glucose concentration has been shown to have a deleterious effect on  $\beta$ -cell function. This "glucotoxic" effect has been demonstrated in vivo in humans and animal and in vitro in cell culture systems (96–99). In partially pancreatectomized NGT rats, a small increment (16 mg/dl) in mean day-long plasma glucose markedly impaired first-phase insulin secretion (98). A similar defect in humans could explain the reduction in early-phase insulin secretion in subjects with isolated IFG or isolated IGT. In animal studies, correction of chronic hyperglycemia with phlorizin in diabetic rats restores first-phase insulin secretion, indicating that in this animal model, impaired first-phase insulin secretion results from chronic hyperglycemia and is reversible upon restoration of normoglycemia (97). Although a similar study in humans will be required to definitively establish the pathogenic role of chronic hyperglycemia in development of impaired insulin secretion, some indirect evidence supports this scenario. Thus, correction of hyperglycemia with insulin in type 2 diabetes improves insulin secretion (100), while acute hyperglycemia in NGT subjects impairs the normal oscillatory  $\beta$ -cell response to glucose (101).

It is noteworthy that the decline in insulin secretion in IGT becomes progressively more severe as 2-h plasma glucose increases from 100 to 139 mg/dl (5.6–7.7 mmol/l), values considered to be within the range of NGT (60). Similarly, the decline in first-phase insulin secretion begins when FPG increases >90 mg/dl (5 mmol/l), which also is well within the range considered to represent normal FPG concentration (102).

### Combined glucose intolerance

Approximately 15–20% of all subjects with glucose intolerance have combined glucose intolerance (CGI), i.e., both IFG (FPG 110–125 mg/dl) and IGT (140–199 mg/dl) (15–22). Subjects with CGI share the metabolic characteristics of IGT and IFG: marked fasting hyperinsulinemia (48,70), reduced insulin sensitivity

during insulin clamp (similar to isolated IGT) (48,70,71), and high HOMA-IR (similar to isolated IFG) (48,68,70,72). Insulin resistance during the clamp reflects muscle insulin resistance, while HOMA-IR indicates hepatic insulin resistance. Subjects with CGI also have a profound reduction in insulin secretion (insulinogenic index) during OGTT (48,68,69,70–72). The combination of severe liver/muscle insulin resistance and markedly impaired insulin secretion in CGI subjects may explain their very high risk (twofold greater than IGT and IFG) for progression to type 2 diabetes in prospective epidemiological studies (15).

### SUMMARY AND CONCLUSIONS

Although IFG and IGT are intermediate states between NGT and overt type 2 diabetes, they represent distinct states of glucose intolerance, which are characterized by different pathophysiologic mechanisms. Both IGT and IFG are insulin-resistant states, but they differ in site of insulin resistance. Subjects with IFG predominantly have hepatic insulin resistance and normal muscle insulin sensitivity, while individuals with IGT have normal to slightly reduced hepatic insulin sensitivity and moderate to severe muscle insulin resistance. Subjects with CGI manifest both forms of insulin resistance in severe form. The pattern of impaired insulin secretion also differs between the two groups. Subjects with isolated IFG manifest a decrease in first-phase insulin secretory response to intravenous glucose and early-phase insulin response to oral glucose. However, late-phase plasma insulin response during OGTT is less severely impaired than in IGT. Subjects with IGT have severe defects in both early- and late-phase insulin responses to intravenous and oral glucose.

The metabolic characteristics described above help to explain the plasma glucose profile following glucose ingestion in IGT, IFG, and CGI. Since first-phase insulin secretion plays an important role in priming the liver and inhibiting endogenous glucose production during an OGTT or a meal (33), the defect in early-phase insulin secretion in IFG and IGT would be expected to impair suppression of hepatic glucose production and contribute to the excessive rise in plasma glucose during the first 60 min of OGTT. In subjects with IGT, the combination of deficient second-phase (late phase during OGTT) insulin secretion

plus muscle insulin resistance results in less efficient disposal of glucose during OGTT. As a result, plasma glucose concentration continues to increase after 60 min and remains elevated at 120 min (Fig. 1). Subjects with IFG start with a high FPG (due to hepatic insulin resistance), but the incremental rise in plasma glucose concentration at 30–60 min is only slightly greater than in NGT (Fig. 1), and, by 120 min, plasma glucose concentration has returned to values similar to those in NGT despite the excessive initial rise. This profile is explained by normal muscle insulin sensitivity (measured with insulin clamp) (48,70,71) with an intact late-phase insulin secretory response (measured by plasma C-peptide deconvolution) (M.A.A.-G., R.A.D., unpublished data), which together maintain a near normal incremental plasma glucose response during OGTT. Individuals with CGI start with a high FPG concentration because of hepatic insulin resistance and have the greatest rise in plasma glucose during OGTT because of muscle/hepatic insulin resistance plus impaired insulin secretion.

In summary, a clearer understanding of the pathophysiologic abnormalities which characterize IGT and IFG provides insights about interventions to slow/halt the progression to type 2 diabetes. Subjects with IFG, who manifest predominant liver insulin resistance, are most likely to benefit from agents, e.g., metformin, that reduce hepatic insulin resistance, as was demonstrated in the Diabetes Prevention Program (103), while subjects with IGT, who predominantly have muscle insulin resistance plus severely impaired insulin secretion, are more likely to respond to agents that improve skeletal muscle insulin resistance, such as peroxisome proliferator-activated receptor- $\gamma$  agonists (91), in combination with an insulin secretagogue, such as GLP-1 analog.

## References

- Gagliardino JJ: Physiological endocrine control of energy homeostasis and postprandial blood glucose levels. *Eur Rev Med Pharmacol Sci* 9:75–92, 2005
- DeFronzo RA: Lilly lecture 1987: The triumvirate: beta-cell, muscle, liver: a collusion responsible for NIDDM. *Diabetes* 37:667–687, 1988
- Bergman RN, Finegood DT, Kahn SE: The evolution of beta-cell dysfunction and insulin resistance in type 2 diabetes. *Eur J Clin Invest* 32 (Suppl. 3):35–45, 2002
- Kahn SE: The relative contributions of insulin resistance and beta-cell dysfunction to the pathophysiology of type 2 diabetes. *Diabetologia* 46:3–19, 2003
- World Health Organization: *Diabetes Mellitus: Report of a WHO Study Group*. Geneva, World Health Org., 1985 (Tech. Rep. Ser., no. 727)
- The Expert Committee on the Diagnosis and Classification of Diabetes Mellitus: Report of the expert committee on the diagnosis and classification of diabetes mellitus. *Diabetes Care* 20:1183–1197, 1997
- Gulli G, Ferrannini E, Stern M, Haffner S, DeFronzo RA: The metabolic profile of NIDDM is fully established in glucose-tolerant offspring of two Mexican-American NIDDM parents. *Diabetes* 41:1575–1586, 1992
- Perseghin G, Ghosh S, Gerow K, Shulman GI: Metabolic defects in lean non-diabetic offspring of NIDDM parents: a cross-sectional study. *Diabetes* 46:1001–1009, 1997
- Gautier JF, Wilson C, Weyer C, Mott D, Knowler WC, Cavaghan M, Polonsky KS, Bogardus C, Pratley RE: Low acute insulin secretory responses in adult offspring of people with early onset type 2 diabetes. *Diabetes* 50:1828–1833, 2001
- Vendrame F, Gottlieb PA: Prediabetes: prediction and prevention trials. *Endocrinol Metab Clin North Am* 33:75–92, 2004
- Davidson MB, Landsman PB, Alexander CM: Lowering the criterion for impaired fasting glucose will not provide clinical benefit. *Diabetes Care* 26:3329–3330, 2003
- Schrager DL, Lorber B: Lowering the cut point for impaired fasting glucose: where is the evidence? Where is the logic? *Diabetes Care* 27:592–601, 2004
- National Diabetes Data Group: Classification and diagnosis of diabetes and other categories of glucose intolerance. *Diabetes* 28: 1039–1057, 1979
- Genuth S, Alberti KG, Bennett P, Buse J, DeFronzo R, Kahn R, Kitzmiller J, Knowler WC, Lebovitz H, Lernmark A, Nathan D, Palmer J, Rizza R, Saudek C, Shaw J, Steffes M, Stern M, Tuomilehto J, Zimmet P, the Expert Committee on the Diagnosis and Classification of Diabetes Mellitus: Follow-up report on the diagnosis of diabetes mellitus. *Diabetes Care* 26:3160–3167, 2003
- Unwin N, Shaw J, Zimmet P, Alberti KGMM: Impaired glucose tolerance and impaired fasting glycemia: the current status on definition and intervention. *Diabet Med* 19:708–723, 2002
- Choi KM, Lee J, Kim DR, Kim SK, Shin DH, Kim NH, Park IB, Choi DS, Baik SH: Comparison of ADA and WHO criteria for the diagnosis of diabetes in elderly Koreans. *Diabet Med* 19:853–857, 2002
- Gabir MM, Hanson RL, Dabelea D, Imperatore G, Romain J, Bennett PH: The 1997 American Diabetes Association and 1999 World Health Organization criteria for hyperglycemia in the diagnosis and prediction of diabetes. *Diabetes Care* 23:1108–1112, 2000
- Dunstan DW, Zimmet PZ, Welborn TA, De Courten MP, Cameron AJ, Sicree RA, Dwyer T, Colagiuri S, Jolley D, Knuiman M, Atkins R, Shaw JE: The rising prevalence of diabetes mellitus and impaired glucose tolerance: the Australian diabetes, obesity and lifestyle study. *Diabetes Care* 25:829–834, 2002
- Shaw JE, Zimmet PZ, de Courten M, Dowse GK, Chitson P, Gareebou H, Hemraj F, Fareed D, Tuomilehto J, Alberti KG: Impaired fasting glucose or impaired glucose tolerance: what best predicts future diabetes in Mauritius? *Diabetes Care* 22:399–402, 1999
- Larsson H, Berglund G, Lindgarde F, Ahren B: Comparison of ADA and WHO criteria for diagnosis of diabetes and glucose intolerance. *Diabetologia* 41:1124–1125, 1998
- de Vegt F, Dekker JM, Stehouwer CD, Nijpels G, Bouter LM, Heine RJ: The 1997 American Diabetes Association criteria versus the 1985 World Health Organization criteria for the diagnosis of abnormal glucose tolerance: poor agreement in the Hoorn Study. *Diabetes Care* 21:1686–1690, 1998
- Harris MI, Eastman RC, Cowie CC, Flegal KM, Eberhardt MS: Comparison of diabetes diagnostic categories in the U.S. population according to the 1997 American Diabetes Association and 1980–85 World Health Organization diagnostic criteria. *Diabetes Care* 20:1859–1862, 1997
- Ko GT, Chan JC, Woo J, Cockram CS: Use of the 1997 American Diabetes Association diagnostic criteria for diabetes in a Hong Kong Chinese population. *Diabetes Care* 21:2094–2097, 1998
- The DECODE Study Group: Glucose tolerance and mortality: comparison of WHO and American Diabetes Association diagnostic criteria. *Lancet* 354:617–621, 1999
- Sadikot SM, Nigam A, Das S, Bajaj S, Zargar AH, Prasannakumar KM, Sosale A, Munichoodappa C, Seshiah V, Singh SK, Jamal A, Sai K, Sadasivrao Y, Murthy SS, Hazra DK, Jain S, Mukherjee S, Bandyopadhyay S, Sinha NK, Mishra R, Dora M, Jena B, Patra P, Goenka K, DiabetesIndia: Comparing the ADA 1997 and the WHO 1999 criteria: prevalence of Diabetes in India Study. *Diabetes Res Clin Pract* 66:309–315, 2004
- Botas P, Delgado E, Castano G, Diaz de Grenu C, Prieto J, Diaz-Cadorniga FJ: Comparison of the diagnostic criteria for



- diabetes mellitus, WHO-1985, ADA-1997 and WHO-1999 in the adult population of Asturias (Spain). *Diabet Med* 20:904–908, 2003
27. DECODE Study Group on behalf of the European Diabetes Epidemiology Study Group: Will new diagnostic criteria for mellitus change phenotype of patients with diabetes? Reanalysis of European epidemiological data. *Br Med J* 317: 371375, 1998
  28. Qiao Q, Hu G, Tuomilehto J, Balkau B, Bord-Johnsen K, for the DECODE Study Group: Age and sex specific prevalence of diabetes and impaired glucose regulation in 13 European cohorts. In *Proceedings of the 37th Annual Meeting of the European Diabetes Epidemiology Group*, 2002. Oxford, U.K., European Diabetes Epidemiology Group, 2002, p. A37
  29. Qiao Q, Nakagami T, Tuomilehto J, Borch-Johnsen K, Balkau B, Iwamoto Y, Tajima N, the International Diabetes Epidemiology Group, the DECODA Study Group: Comparison of the fasting and the 2-hour glucose criteria for diabetes in different Asian cohorts. *Diabetologia* 43:1470–1475, 2000
  30. Qiao Q, Hu G, Tuomilehto J, Nakagami T, Balkau B, Borch-Johnsen K, Ramachandran A, Mohan V, Iyer SR, Tomimaga M, Kiyahara Y, Kato I, Okubo K, Nagai M, Shibasaki S, Yang Z, Tong Z, Fan Q, Wang B, Chew SK, Tan BY, Heng D, Emmanuel S, Tajima N, Iwamoto Y, Snehalatha C, Vijay V, Kapur A, Dong Y, Nan H, Gao W, Shi H, Fu F, the DECODE Study Group: Age and sex specific prevalence of diabetes and impaired glucose regulation in 10 Asian cohorts. *Diabetes Res Clin Prac* 56:540, 2002
  31. DeFronzo RA: Pathogenesis of type 2 diabetes mellitus: metabolic and molecular implications for identifying diabetes genes. *Diabetes Rev* 5:117–269, 1997
  32. Gerich JE, Meyer C, Woerle HJ, Stumvoll M: Renal gluconeogenesis: its importance in human glucose homeostasis. *Diabetes Care* 24:382–391, 2001
  33. DeFronzo RA, Ferrannini E, Simonson DC: Fasting hyperglycemia in non-insulin-dependent diabetes mellitus: contributions of excessive hepatic glucose production and impaired tissue glucose uptake. *Metabolism* 38:387–395, 1989
  34. Cherrington AD: Banting Lecture 1997: Control of glucose uptake and release by the liver in vivo. *Diabetes* 48:1198–214, 1999
  35. DeFronzo RA, Ferrannini E: Regulation of hepatic glucose metabolism in humans. *Diabetes Metab Rev* 3:415–459, 1987
  36. Katz LD, Glickman MG, Rapoport S, Ferrannini E, DeFronzo RA: Splanchnic and peripheral disposal of oral glucose in man. *Diabetes* 32:675–679, 1983
  37. DeFronzo RA, Ferrannini E, Hendler R, Wahren J, Felig P: Influence of hyperinsulinemia, hyperglycemia, and the route of glucose administration on splanchnic glucose exchange. *Proc Natl Acad Sci U S A* 75:5173–5177, 1978
  38. DeFronzo RA, Tobin JD, Andres R: Glucose clamp technique: a method for quantifying insulin secretion and resistance. *Am J Physiol* 237:E214–E223, 1979
  39. DeFronzo RA, Gunnarsson R, Bjorkman O, Olsson M, Wahren J: Effects of insulin on peripheral and splanchnic glucose metabolism in non-insulin-dependent (type II) diabetes mellitus. *J Clin Invest* 76:149–155, 1985
  40. Bergman RN: Lilly lecture 1989: Toward physiological understanding of glucose tolerance: minimal-model approach. *Diabetes* 38:1512–1527, 1989
  41. Bergman R, Prager R, Volund A, Olefsky J: Equivalence of the insulin sensitivity index derived by the minimal model method and the euglycemic clamp. *J Clin Invest* 79:790–800, 1987
  42. Matsuda M, DeFronzo RA: Insulin sensitivity indices obtained from oral glucose tolerance testing: comparison with the euglycemic glucose clamp. *Diabetes Care* 22:1462–1470, 1999
  43. Matthews D, Hosker J, Rudenski A, Naylor B, Treacher D, Turner R: Homeostasis model assessment: insulin resistance and beta cell function from fasting plasma glucose and insulin concentrations in man. *Diabetologia* 28:412–419, 1985
  44. Katz A, Nambi SS, Mather K, Baron AD, Follmann DA, Sullivan G, Quon MJ: Quantitative insulin sensitivity check index: a simple, accurate method for assessing insulin sensitivity in humans. *J Clin Endocrinol Metab* 85:2402–2410, 2000
  45. Matsuda M, DeFronzo RA: Relationship between insulin sensitivity in adipose tissue, liver, muscle, and components of the insulin resistance syndrome (Abstract). *Diabetes* 46 (Suppl. 1):68A, 1997
  46. Bonora E, Targher G, Alberiche M, Bonadonna RC, Saggiani F, Zenere MB, Monauni T, Muggeo M: Homeostasis model assessment closely mirrors the glucose clamp technique in the assessment of insulin sensitivity: studies in subjects with various degrees of glucose tolerance and insulin sensitivity. *Diabetes Care* 23:57–63, 2000
  47. Tripathy D, Almgren P, Tuomi T, Groop L: Contribution of insulin-stimulated glucose uptake and basal hepatic insulin sensitivity to surrogate measures of insulin sensitivity. *Diabetes Care* 27:2204–2210, 2004
  48. Abdul-Ghani MA, Tripathy D, Jenkinson C, Ritchardson D, DeFronzo RA: Insulin secretion and insulin action in subjects with impaired fasting glucose and impaired glucose tolerance: results from the Veterans Administration Genetic Epidemiology Study (VEGAS). *Diabetes*. In press
  49. Ferrannini E, Reichard GA, Bjorkman O, Wahren J, Pilo A, Olsson M, DeFronzo RA: The disposal of an oral glucose load in healthy subjects: a quantitative study. *Diabetes* 34:580–588, 1985
  50. Creutzfeldt W: The incretin concept today. *Diabetologia* 16:75–85, 1979
  51. Hansotia T, Drucker DJ: GIP and GLP-1 as incretin hormones: lessons from single and double incretin receptor knockout mice. *Regul Pept* 128:125–134, 2005
  52. Rask E, Olsson T, Soderberg S, Holst JJJ, Tura A, Pacini G, Ahren B: Insulin secretion and incretin hormones after oral glucose in non-obese subjects with impaired glucose tolerance. *Metabolism* 53: 624–631, 2004
  53. Vilsbell T, Krarup T, Madsbad S, Holst JJ: Defective amplification of the late phase insulin response to glucose by GIP in obese type II diabetic patients. *Diabetologia* 45:1111–1119, 2002
  54. Byrne MM, Gliem K, Wank U, Arnold R, Katschinski M, Polonsky KS, Goke B: Glucagon-like peptide 1 improves the ability of the  $\beta$ -cell to sense and respond to glucose in subjects with impaired glucose tolerance. *Diabetes* 47:1259–1265, 1998
  55. Meier JJ, Hucking K, Holst JJ, Deacon CF, Schmiegel WH, Nauck MA: Reduced insulinotropic effect of gastric inhibitory polypeptide in first-degree relatives of patients with type 2 diabetes. *Diabetes* 50:2497–2504, 2001
  56. Ahren B, Taborsky GJ: Beta-cell function and insulin secretion. In *Ellenberg and Rifkin's Diabetes Mellitus*. Porte D, Sherwin RS, Baron A, Eds. New York, McGraw Hill, 2003, p. 43–65
  57. Diamond MP, Thornton K, Connolly-Diamond M, Sherwin RS, DeFronzo RA: Reciprocal variations in insulin-stimulated glucose uptake and pancreatic insulin secretion in women with normal glucose tolerance. *J Soc Gynecol Investig* 2:708–715, 1995
  58. Kahn SE, Prigeon RL, McCulloch DK, Boyko EJ, Bergman RN, Schwartz MW, Neifing JL, Ward WK, Beard JC, Palmer JP: Quantification of the relationship between insulin sensitivity and beta-cell function in human subjects: evidence for a hyperbolic function. *Diabetes* 42:1663–1672, 1993
  59. Bergman RN, Ader M, Huecking K, Van Citters G: Accurate assessment of beta-cell function: the hyperbolic correction. *Diabetes* 51 (Suppl. 1):S212–S220, 2002
  60. Gastaldelli A, Ferrannini E, Miyazaki Y, Matsuda M, DeFronzo RA: San Antonio Metabolism study: beta-cell dysfunction and glucose intolerance: results from the San Antonio metabolism (SAM) study.



- Diabetologia* 47:31–39, 2004
61. Pratley RE, Weyer C: The role of impaired early insulin secretion in the pathogenesis of type II diabetes mellitus. *Diabetologia* 44:929–945, 2001
62. Pimenta W, Korytkowski M, Mitrakou A, Jenssen T, Yki-Jarvinen H, Evron W, Dailey G, Gerich J: Pancreatic beta-cell dysfunction as the primary genetic lesion in NIDDM: evidence from studies in normal glucose-tolerant individuals with a first-degree NIDDM relative. *JAMA* 273:1855–1861, 1995
63. Owens DR, Cozma LS, Luzio SD: Early-phase prandial insulin secretion: its role in the pathogenesis of type 2 diabetes mellitus and its modulation by repaglinide. *Diabetes Nutr Metab* 15 (Suppl. 6): 19–27, 2002
64. Del Prato S, Tiengo A: The importance of first-phase insulin secretion: implications for the therapy of type 2 diabetes mellitus. *Diabetes Metab Res Rev* 17:164–174, 2001
65. Korytkowski MT, Berga SL, Horwitz MJ: Comparison of the minimal model and the hyperglycemic clamp for measuring insulin sensitivity and acute insulin response to glucose. *Metabolism* 44:1121–1125, 1995
66. Phillips DI, Clark PM, Hales CN, Osmond C: Understanding oral glucose tolerance: comparison of glucose or insulin measurements during the oral glucose tolerance test with specific measurements of insulin resistance and insulin secretion. *Diabet Med* 11:286–292, 1994
67. Zhou W, Li H, Gu Y, Yu L, Han J, Xu W, Jian W, Tian J, Zhou W, Zhang D, Liu Y, Yang J, Li J, Li G, Luo M: The ROC analysis for different time points during oral glucose tolerance test. *Diabetes Res Clin Pract* [Epub ahead of print]
68. Hanefeld M, Koehler C, Fuecker K, Henkel E, Schaper F, Temelkova-Kurktschiew T, the Impaired Glucose Tolerance for Atherosclerosis and Diabetes study: Insulin secretion and insulin sensitivity pattern is different in isolated impaired glucose tolerance and impaired fasting glucose: the risk factor in Impaired Glucose Tolerance for Atherosclerosis and Diabetes study. *Diabetes Care* 26:868–874, 2003
69. Abdul-Ghani MA, Sabbah M, Kher J, Minuchin O, Vardi P, Raz I: Different contributions of insulin resistance and beta-cell dysfunction in overweight Israeli Arabs with IFG and IGT. *Diabetes Metab Res Rev* 22:126–130, 2006
70. Weyer C, Bogardus C, Pratley RE: Metabolic characteristics of individuals with impaired fasting glucose and/or impaired glucose tolerance. *Diabetes* 48:2197–203, 1999
71. Wasada T, Kuroki H, Katsumori K, Arii H, Sato A, Aoki K, Jimba S, Hanai G: Who are more insulin resistant, people with IFG or people with IGT? *Diabetologia* 47:758–759, 2004
72. Festa A, D'Agostino R Jr, Hanley AJ, Karter AJ, Saad MF, Haffner SM: Differences in insulin resistance in nondiabetic subjects with isolated impaired glucose tolerance or isolated impaired fasting glucose. *Diabetes* 53:1549–1555, 2004
73. Osei K, Gaillard T, Schuster DP: Pathogenetic mechanisms of impaired glucose tolerance and type II diabetes in African-Americans: the significance of insulin secretion, insulin sensitivity, and glucose effectiveness. *Diabetes Care* 20:396–404, 1997
74. van Haeften TW, Pimenta W, Mitrakou A, Korytkowski M, Jenssen T, Yki-Jarvinen H, Gerich JE: Disturbances in  $\beta$ -cell function in impaired fasting glycemia. *Diabetes* 51 (Suppl. 1):S265–S270, 2002
75. Piche ME, Despres JP, Pascot A, Nadeau A, Tremblay A, Weisnagel SJ, Bergeron J, Lemieux S: Impaired fasting glucose vs. glucose intolerance in pre-menopausal women: distinct metabolic entities and cardiovascular disease risk? *Diabet Med* 21:730–737, 2004
76. Davies MJ, Raymond NT, Day JL, Hales CN, Burden AC: Impaired glucose tolerance and fasting hyperglycaemia have different characteristics. *Diabet Med* 17: 433–440, 2000
77. Snehalatha C, Ramachandran A, Sivasankari S, Satyavani K, Vijay V: Insulin secretion and action show differences in impaired fasting glucose and in impaired glucose tolerance in Asian Indians. *Diabetes Metab Res Rev* 19:329–332, 2003
78. Novoa FJ, Boronat M, Saavedra P, Diaz-Cremades JM, Varillas VF, La Roche F, Alberiche MP, Carrillo A: Differences in cardiovascular risk factors, insulin resistance, and insulin secretion in individuals with normal glucose tolerance and in subjects with impaired glucose regulation: the Telde Study. *Diabetes Care* 28: 2388–2393, 2005
79. Hsieh CH, Kuo SW, Hung YJ, Shen DC, Ho CT, Lian WC, Lee CH, Fan SC, Pei D: Metabolic characteristics in individuals with impaired glucose homeostasis. *Int J Clin Pract* 5:639–644, 2005
80. Sargin M, Ikişik M, Sargin H, Orcun A, Kaya M, Gozu H, Dabak R, Bayramicli OU, Yayla A: The effect of defective early phase insulin secretion on postload glucose intolerance in impaired fasting glucose. *Endocr J* 52:531–536, 2005
81. Pimenta WP, Santos ML, Cruz NS, Aragon FF, Padovani CR, Gerich JE: Brazilian individuals with impaired glucose tolerance are characterized by impaired insulin secretion. *Diabetes Metab* 28: 468–476, 2002
82. Vauhkonen I, Niskanen L, Vanninen E, Kainulainen S, Uusitupa M, Laakso M: Defects in insulin secretion and insulin action in non-insulin-dependent diabetes mellitus are inherited: metabolic studies on offspring of diabetic probands. *J Clin Invest* 101:86–96, 1998
83. Arslanian SA, Bacha F, Saad R, Gungor N: Family history of type 2 diabetes is associated with decreased insulin sensitivity and an impaired balance between insulin sensitivity and insulin secretion in white youth. *Diabetes Care* 28:115–119, 2005
84. Kashyap SR, Belfort R, Berria R, Suramornkul S, Pratipranawar T, Finlayson J, Barrentine A, Bajaj M, Mandarino L, DeFronzo R, Cusi K: Discordant effects of a chronic physiological increase in plasma FFA on insulin signaling in healthy subjects with or without a family history of type 2 diabetes. *Am J Physiol Endocrinol Metab* 287:E537–E546, 2004
85. Lillioja S, Mott DM, Zawadzki JK, Young AA, Abbott WG, Knowler WC, Bennett PH, Moll P, Bogardus C: In vivo insulin action is familial characteristics in non-diabetic Pima Indians. *Diabetes* 36: 1329–1335, 1987
86. Tripathy D, Carlsson M, Almgren P, Iso-maa B, Taskinen MR, Tuomi T, Groop LC: Insulin secretion and insulin sensitivity in relation to glucose tolerance: lessons from the Botnia Study. *Diabetes* 49:975–980, 2000
87. Carnevale Schianca GP, Rossi A, Sainaghi PP, Maduli E, Bartoli E: The significance of impaired fasting glucose versus impaired glucose tolerance: importance of insulin secretion and resistance. *Diabetes Care* 26:1333–1337, 2003
88. Ferrannini E, Gastaldelli A, Miyazaki Y, Matsuda M, Mari A, DeFronzo RA: Beta-cell function in subjects spanning the range from normal glucose tolerance to overt diabetes: a new analysis. *J Clin Endocrinol Metab* 90:493–500, 2005
89. Ahren B, Pacini G: Impaired adaptation of first-phase insulin secretion in postmenopausal women with glucose intolerance. *Am J Physiol* 273:E701–E707, 1997
90. Kitabchi AE, Tempresa M, Knowler WC, Kahn SE, Fowler SE, Haffner SM, Andres R, Saudek C, Edelstein SL, Arakaki R, Murphy MB, Shamon H, the Diabetes Prevention Program Research Group: Role of insulin secretion and sensitivity in the evolution of type 2 diabetes in the diabetes prevention program: effects of lifestyle intervention and metformin. *Diabetes* 54:2404–2414, 2005
91. Buchanan TA, Xiang AH, Peters RK, Kjos SL, Marroquin A, Goico J, Ochoa C, Tan S, Berkowitz K, Hodis HN, Azen SP: Preservation of pancreatic  $\beta$ -cell function and prevention of type 2 diabetes by pharmacological treatment of insulin resistance in high-risk hispanic women. *Diabetes* 51:2796–803, 2002

92. Lillioja S, Nyomba BL, Saad MF, Ferraro R, Castillo C, Bennett PH, Bogardus C: Exaggerated early insulin release and insulin resistance in a diabetes-prone population: a metabolic comparison of Pima Indians and Caucasians. *J Clin Endocrinol Metab* 73:866–876, 1991
93. Weyer C, Bogardus C, Mott DM, Pratley RE: The natural history of insulin secretory dysfunction and insulin resistance in the pathogenesis of type 2 diabetes mellitus. *J Clin Invest* 104:787–794, 1999
94. Haffner SM, Miettinen H, Gaskill SP, Stern MP: Decreased insulin action and insulin secretion predict the development of impaired glucose tolerance. *Diabetologia* 39:1201–1207, 1996
95. Ferrannini E, Gastaldelli A, Miyazaki Y, Matsuda M, Pettiti M, Natali A, Mari A, DeFronzo RA: Predominant role of reduced beta-cell sensitivity to glucose over insulin resistance in impaired glucose tolerance. *Diabetologia* 46:1211–1219, 2003
96. Ehrmann DA, Breda E, Cavaghan MK, Bajramovic S, Imperial J, Toffolo G, Cobelli C, Polonsky KS: Insulin secretory responses to rising and falling glucose concentrations are delayed in subjects with impaired glucose tolerance. *Diabetologia* 45:509–517, 2002
97. Rossetti L, Shulman GI, Zawulich W, DeFronzo RA: Effect of chronic hyperglycemia on in vivo insulin secretion in partially pancreatectomized rats. *J Clin Invest* 80:1037–1044, 1987
98. Leahy JL, Bonner-Weir S, Weir GC: Minimal chronic hyperglycemia is a determinant of impaired insulin secretion after an incomplete pancreatectomy. *J Clin Invest* 81:1407–1414, 1988
99. Olson LK, Redmon JB, Towle HC, Robertson RP: Chronic exposure of HIT cells to high glucose concentrations paradoxically decreases insulin gene transcription and alters binding of insulin gene regulatory protein. *J Clin Invest* 92:514–519, 1993
100. Garvey WT, Olefsky JM, Griffin J, Hamman RF, Kolterman OG: The effect of insulin treatment on insulin secretion and insulin action in type 2 diabetes mellitus. *Diabetes* 34:222–234, 1985
101. Meyer J, Sturis J, Katschinski M, Arnold R, Goke B, Byrne MM: Acute hyperglycemia alters the ability of the normal beta-cell to sense and respond to glucose. *Am J Physiol Endocrinol Metab* 282:E917–E922, 2002
102. Godsland IF, Jeffs JA, Johnston DG: Loss of beta cell function as fasting glucose increases in the non-diabetic range. *Diabetologia* 47:1157–1166, 2004
103. Diabetes Prevention Research Group: Reduction in the incidence of type 2 diabetes with lifestyle intervention or metformin. *N Engl J Med* 346:393–403, 2002
